# Supplementary material for: Evaluation of a Web Portal for Improving Public Access to Evidence-Based Health Information and Health Literacy Skills: A Pragmatic Trial
Source: PLoS One. 2012 May 31;7(5):e37715. doi: 10.1371/journal.pone.0037715 (PMC3365121; doi:10.1371/journal.pone.0037715)
Supplement: Checklist S1 — CONSORT checklist. (DOC) [file pone.0037715.s001.doc]

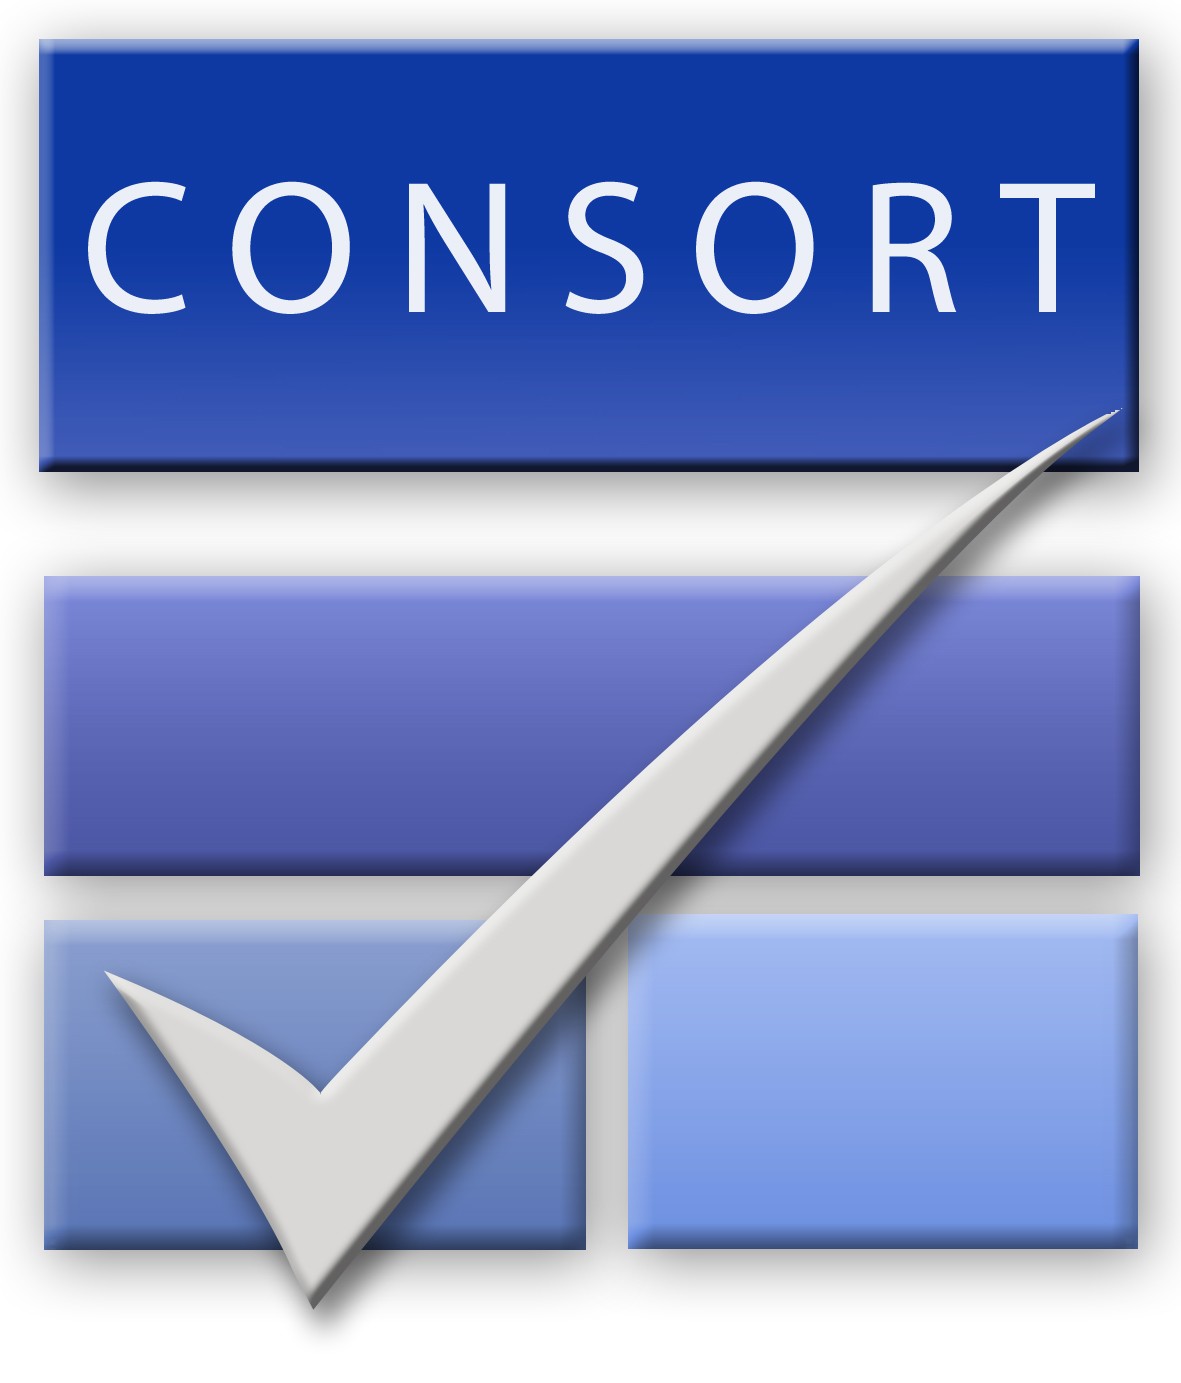
CONSORT 2010 checklist of information to include when reporting a randomised trial*

| Section/Topic | Item No | Checklist item | Reported on page No |
| --- | --- | --- | --- |
| Title and abstract | | | |
|  | 1a | Identification as a randomised trial in the title | Title |
| 1b | Structured summary of trial design, methods, results, and conclusions (for specific guidance see CONSORT for abstracts) | Abstract |
| Introduction | | | |
| Background and objectives | 2a | Scientific background and explanation of rationale | Introduction and background |
| 2b | Specific objectives or hypotheses | Introduction and background |
| Methods | | | |
| Trial design | 3a | Description of trial design (such as parallel, factorial) including allocation ratio | Methods section: design |
| 3b | Important changes to methods after trial commencement (such as eligibility criteria), with reasons | Not applicable |
| Participants | 4a | Eligibility criteria for participants | Methods section: Participants and recruitment |
| 4b | Settings and locations where the data were collected | Methods section: Participants and recruitment **+** Sources and methods of recruitment |
| Interventions | 5 | The interventions for each group with sufficient details to allow replication, including how and when they were actually administered | Methods section: Randomisation methods and allocation concealment +intervention delivery (also in another publication) |
| Outcomes | 6a | Completely defined pre-specified primary and secondary outcome measures, including how and when they were assessed | Methods section: outcome assessment and analysis |
| 6b | Any changes to trial outcomes after the trial commenced, with reasons | Not applicable |
| Sample size | 7a | How sample size was determined | Methods section: sample size justification |
| 7b | When applicable, explanation of any interim analyses and stopping guidelines | Not applicable |
| Randomisation: |  |  |  |
| Sequence generation | 8a | Method used to generate the random allocation sequence | Methods section: Randomisation methods and allocation concealment |
| 8b | Type of randomisation; details of any restriction (such as blocking and block size) | Methods section: Randomisation methods and allocation concealment |
| Allocation concealment mechanism | 9 | Mechanism used to implement the random allocation sequence (such as sequentially numbered containers), describing any steps taken to conceal the sequence until interventions were assigned | Methods section: Randomisation methods and allocation concealment |
| Implementation | 10 | Who generated the random allocation sequence, who enrolled participants, and who assigned participants to interventions | Jan Odgaard-Jensen generated the randomisation sequence. Astrid Austvoll- Dahlgren enrolled participants and assigned them to the intervention |
| Blinding | 11a | If done, who was blinded after assignment to interventions (for example, participants, care providers, those assessing outcomes) and how | Participants |
| 11b | If relevant, description of the similarity of interventions | Not applicable |
| Statistical methods | 12a | Statistical methods used to compare groups for primary and secondary outcomes | Mean differences (t-tests), multiple regression |
| 12b | Methods for additional analyses, such as subgroup analyses and adjusted analyses |  |
| Results | | | |
| Participant flow (a diagram is strongly recommended) | 13a | For each group, the numbers of participants who were randomly assigned, received intended treatment, and were analysed for the primary outcome | See diagram |
| 13b | For each group, losses and exclusions after randomisation, together with reasons | See diagram |
| Recruitment | 14a | Dates defining the periods of recruitment and follow-up | Methods section: intervention delivery |
| 14b | Why the trial ended or was stopped | Methods section: intervention delivery |
| Baseline data | 15 | A table showing baseline demographic and clinical characteristics for each group | Table 2 |
| Numbers analysed | 16 | For each group, number of participants (denominator) included in each analysis and whether the analysis was by original assigned groups | Table 2. Methods section: Missing data, and results: description of study participants |
| Outcomes and estimation | 17a | For each primary and secondary outcome, results for each group, and the estimated effect size and its precision (such as 95% confidence interval) | Graph 1 and Table 3 to 4 + Results section |
| 17b | For binary outcomes, presentation of both absolute and relative effect sizes is recommended | Results section |
| Ancillary analyses | 18 | Results of any other analyses performed, including subgroup analyses and adjusted analyses, distinguishing pre-specified from exploratory | Not applicable |
| Harms | 19 | All important harms or unintended effects in each group (for specific guidance see CONSORT for harms) | Results section and discussion section |
| Discussion | | | |
| Limitations | 20 | Trial limitations, addressing sources of potential bias, imprecision, and, if relevant, multiplicity of analyses | Discussion: study limitations |
| Generalisability | 21 | Generalisability (external validity, applicability) of the trial findings | Discussion |
| Interpretation | 22 | Interpretation consistent with results, balancing benefits and harms, and considering other relevant evidence | Discussion |
| Other information | | |  |
| Registration | 23 | Registration number and name of trial registry | 1 (ClinicalTrials.gov Identifier: NCT01266798) |
| Protocol | 24 | Where the full trial protocol can be accessed, if available | Clincaltrials.gov |
| Funding | 25 | Sources of funding and other support (such as supply of drugs), role of funders | Conflicts of interest |

*We strongly recommend reading this statement in conjunction with the CONSORT 2010 Explanation and Elaboration for important clarifications on all the items. If relevant, we also recommend reading CONSORT extensions for cluster randomised trials, non-inferiority and equivalence trials, non-pharmacological treatments, herbal interventions, and pragmatic trials. Additional extensions are forthcoming: for those and for up to date references relevant to this checklist, see [www.consort-statement.org](http://www.consort-statement.org/).
